# Supplementary material for: Polyallylamine Binds to Aβ Amyloid and Inhibits Antibody Recognition
Source: MDPI journal article supplement (doi:10.3390/ijms25063112), 2024-03-07
Supplement: s1 [file s1]

## Supplementary Information

### Polyallylamine binds to A $\beta$ amyloid and inhibits antibody recognition

Yusuke Tsuchie <sup>1,†</sup>, Soichiro Kusuda <sup>2,†</sup>, Haruka Kawabe <sup>1</sup>, Wakako Mori <sup>1</sup>, Mikael Lindgren <sup>2,3</sup>, Yutaka Watanabe <sup>2</sup> and Tamotsu Zako <sup>1,2\*</sup>

<sup>1</sup>*Department of Chemistry and Biology, Graduate School of Science and Engineering, Ehime University, 2-5 Bunkyo, Matsuyama, Ehime 790-8577, Japan [zako.tamotsu.us@ehime-u.ac.jp](mailto:zako.tamotsu.us@ehime-u.ac.jp) (T.Z.)*

<sup>2</sup>*Department of Chemistry, Faculty of Science, Ehime University, 2-5 Bunkyo, Matsuyama, Ehime 790-8577, Japan*

<sup>3</sup>*Department of Physics, Faculty of Natural Sciences, Norwegian University of Science and Technology (NTNU), Gløshaugen, Realfagsbygget, Trondheim 7490, Norway*

*\*Correspondence: [zako.tamotsu.us@ehime-u.ac.jp](mailto:zako.tamotsu.us@ehime-u.ac.jp)*

*†These authors contributed equally to this work.*

### Table of Contents

**Figure S1** Native PAGE analysis of the A $\beta$  samples incubated with PAA.

**Figure S2** Dot blot assay of A $\beta$  amyloid with or without PAA.

**Figure S3** ThT assay of A $\beta$  amyloid incubated with PAA for 5 min or 24 h.

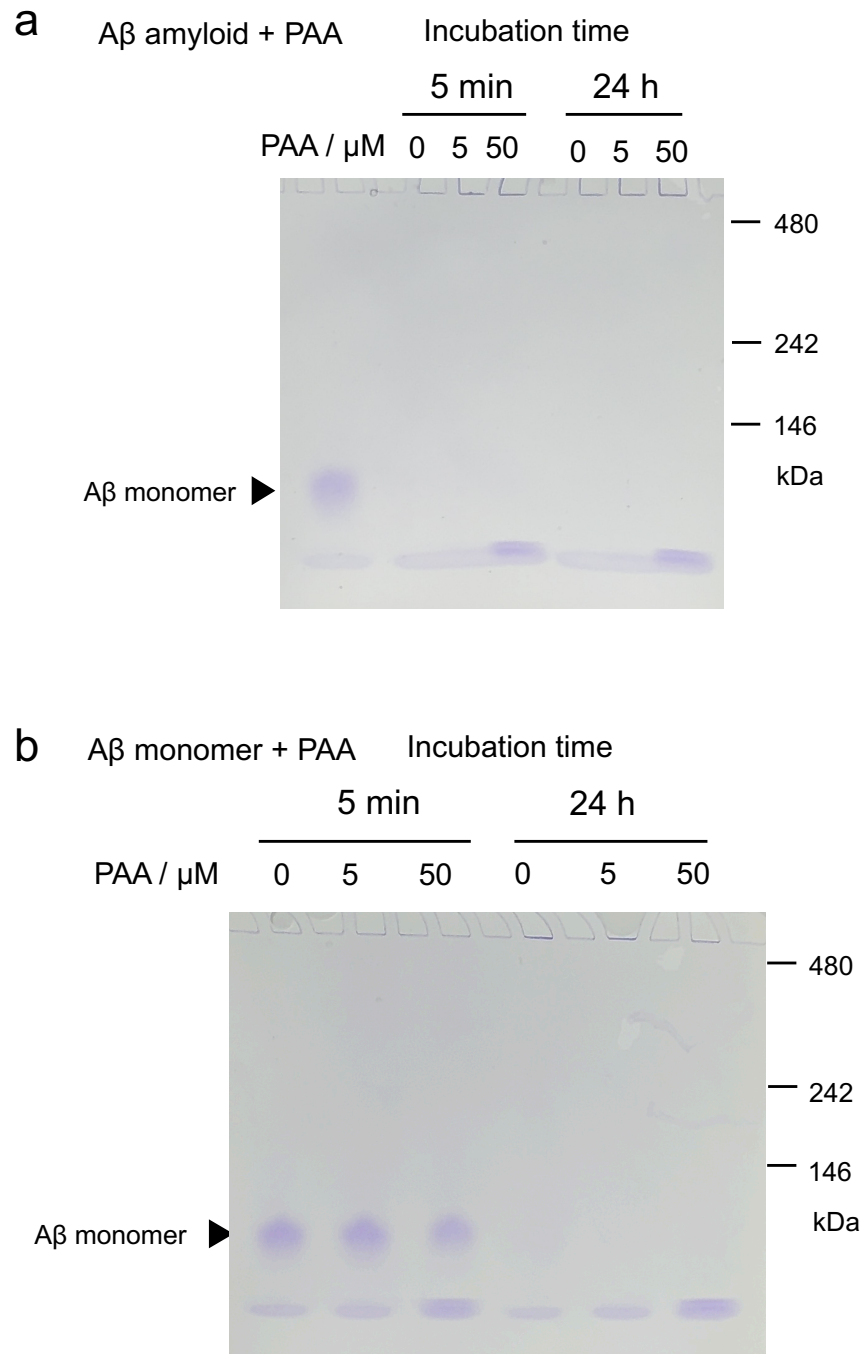

**Figure S1.** Native PAGE analysis of the A $\beta$  samples incubated with PAA. **a)** Native PAGE analysis of A $\beta$  amyloids incubated with PAA. The A $\beta$  amyloids samples (25  $\mu$ M) were incubated in the absence or presence of 5 and 50  $\mu$ M PAA for 5 min, and the samples (13.5  $\mu$ L) mixed with a sample buffer were applied to an 8% native gel and run at a current of 20 mA. **b)** Native PAGE analysis of the A $\beta$  monomer samples incubated with PAA. A $\beta$  monomer samples (25  $\mu$ M) were incubated in the absence or presence of 5 and 50  $\mu$ M PAA for 24 h, and the samples (13.5  $\mu$ L) mixed with a sample buffer were applied to an 8% native gel. The A $\beta$  monomer samples incubated with PAA for 5 min were shown as control samples. The proteins were stained by 0.1% (w/v) Coomassie Brilliant Blue (CBB) solution. The marker proteins are shown as molecular weight markers in kDa.

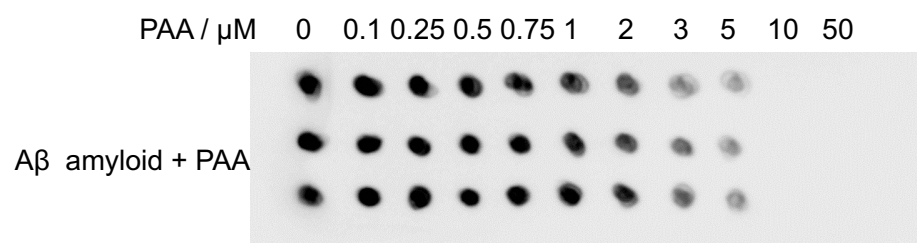

**Figure S2.** Dot blot assay of A $\beta$  amyloid with or without PAA. Dot blot images of A $\beta$  amyloid incubated with 0–50  $\mu\text{M}$  PAA for 5 min using 6E10 antibody.

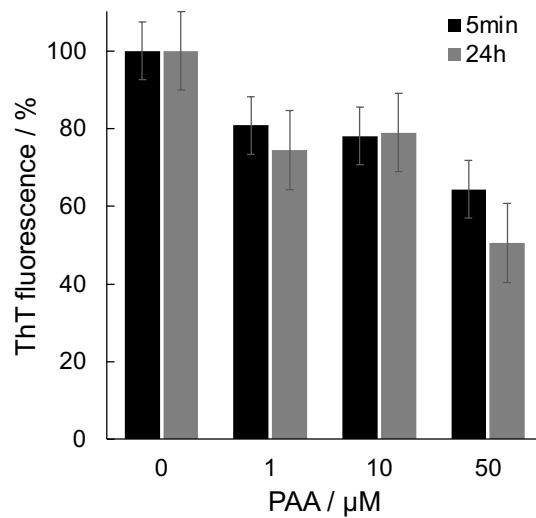

**Figure S3.** ThT assay of A $\beta$  amyloid incubated with PAA for 5 min or 24 h. The A $\beta$  amyloid samples (25  $\mu\text{M}$ ) were incubated with 0-50  $\mu\text{M}$  PAA for 5 min or 24 h at room temperature before ThT assay. The fluorescent intensity of 2.5  $\mu\text{M}$  A $\beta$  amyloid samples including 20  $\mu\text{M}$  ThT in the phosphate buffer was measured (excitation, 420 nm; emission, 490 nm) using a microplate reader. The average values of three wells were calculated. The intensity of the samples without PAA was normalized as 100%.
